# Supplementary material for: Regulation of endothelial Fas expression as a mechanism of promotion of vascular integrity by mural cells in tumors
Source: PubMed Central journal article supplement — Cancer Sci. 2017 May 24;108(5):1080–8. doi: 10.1111/cas.13216 (PMC5448593; doi:10.1111/cas.13216), 2017-05-24
Supplement: CAS-108-1080-s002.pdf [file CAS-108-1080-s002.pdf]

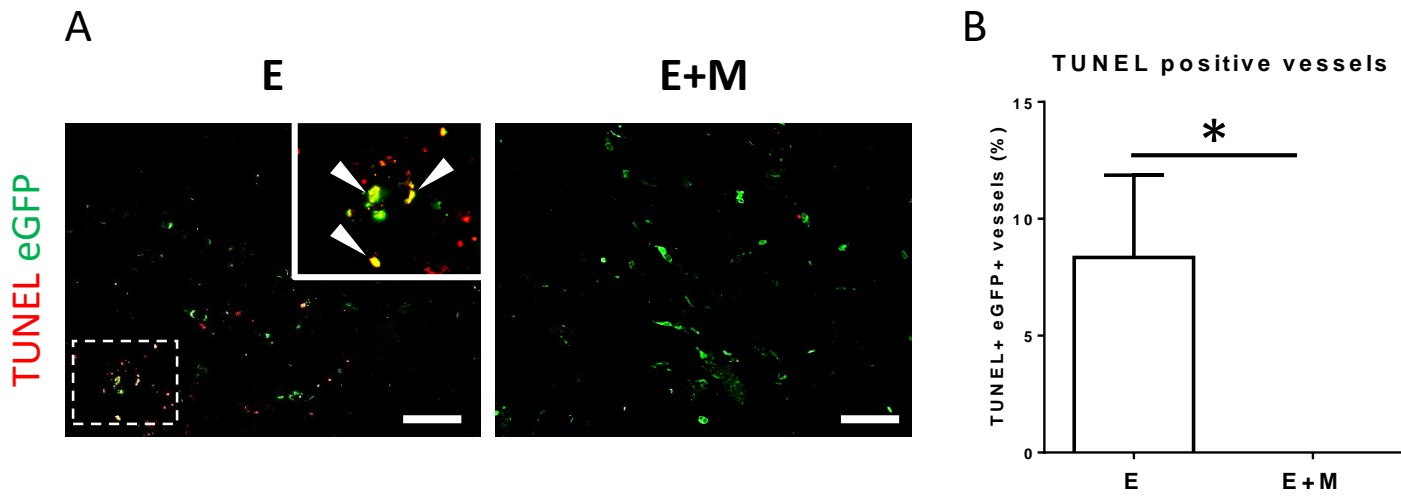

**Figure S2. TUNEL staining of xenografts revealed decreased apoptosis of MS-1 cells in E+M condition xenografts**

(A) Representative images of Terminal deoxynucleotidyl Transferase (TdT)-mediated dUTP nick end labeling (TUNEL) staining (red) performed on E and E+M condition xenografts on day 7 together with staining for eGFP expressed in the injected MS-1 cells (green). Inset: higher magnification of the area indicated by white dashed lines. White arrowheads indicate TUNEL positive MS-1 cells. (B) Quantification of TUNEL positive vessels as shown in A. TUNEL positive vessels were markedly reduced in the E+M condition xenografts. Scale bars = 100  $\mu$ m. Data represented as mean  $\pm$  S.D. in all graphs. \*:  $p < 0.05$ ; Student's t-test.
