# Supplementary material for: Regulation of endothelial Fas expression as a mechanism of promotion of vascular integrity by mural cells in tumors
Source: PubMed Central journal article supplement — Cancer Sci. 2017 May 24;108(5):1080–8. doi: 10.1111/cas.13216 (PMC5448593; doi:10.1111/cas.13216), 2017-05-24
Supplement: CAS-108-1080-s003.pdf [file CAS-108-1080-s003.pdf]

A

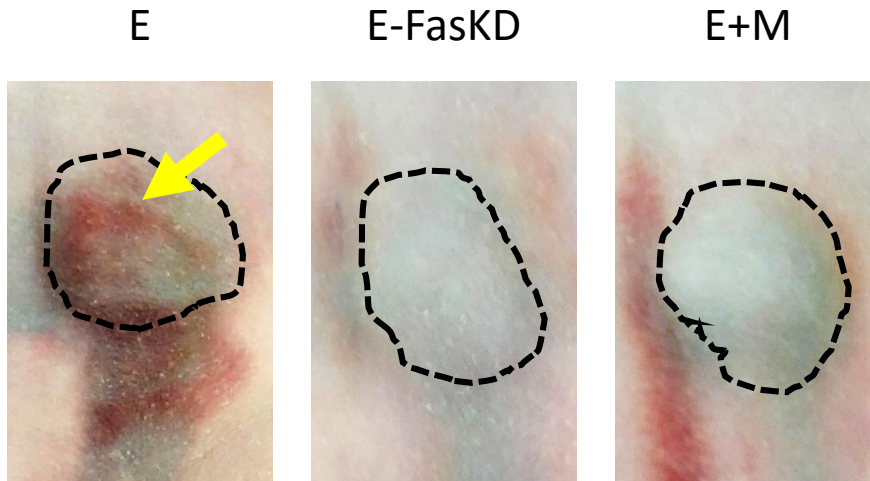

B

| Degree of hemorrhage | E   | E-FasKD | E+M |
|----------------------|-----|---------|-----|
| Mild                 | 0   | 2/3     | 3/3 |
| Severe               | 3/3 | 1/3     | 0   |

**Figure S3. Macroscopic evaluation of xenografts revealed that the presence of 10T1/2 cells or siRNA-mediated knockdown of Fas in MS-1 cells attenuated the severity of hemorrhage *in vivo*** (A) Representative macroscopic images of xenografts obtained on day 4. Black dotted lines and yellow arrows indicate tumor borders and severe hemorrhage, respectively. (B) The degree of hemorrhage was scored and summarized as a table. While all E condition xenografts presented with severe hemorrhage, the presence of 10T1/2 cells in the E+M condition prevented severe hemorrhage. The siRNA-mediated knockdown of Fas in MS-1 cells in the E-FasKD condition showed an intermediate phenotype: not all xenografts presented with severe hemorrhage.
